# Supplementary material for: Comprehensive deletion landscape of CRISPR-Cas9 identifies minimal RNA-guided DNA-binding modules
Source: PubMed Central journal article supplement (PMC8476515; doi:10.1038/s41467-021-25992-8), 2021-09-27
Supplement: 41467_2021_25992_MOESM4_ESM.pdf [file 41467_2021_25992_MOESM4_ESM.pdf]

**Title:** Supplementary Data 1

**Description:** Tables of oligonucleotides, plasmid sequences, and DNA fragments used in this study, provided in separate spreadsheets. See Methods section and Supplementary Information for more details.
